# Supplementary material for: Development of tris(amino)phosphonium electrolytes for high performing sodium batteries
Source: Royal Society of Chemistry journal article supplement (doi:10.1039/d3ta03741j), 2023-01-01
Supplement: d3ta03741j1.pdf [file d3ta03741j1.pdf]

## Supporting Information

The Supporting Information is available free of charge

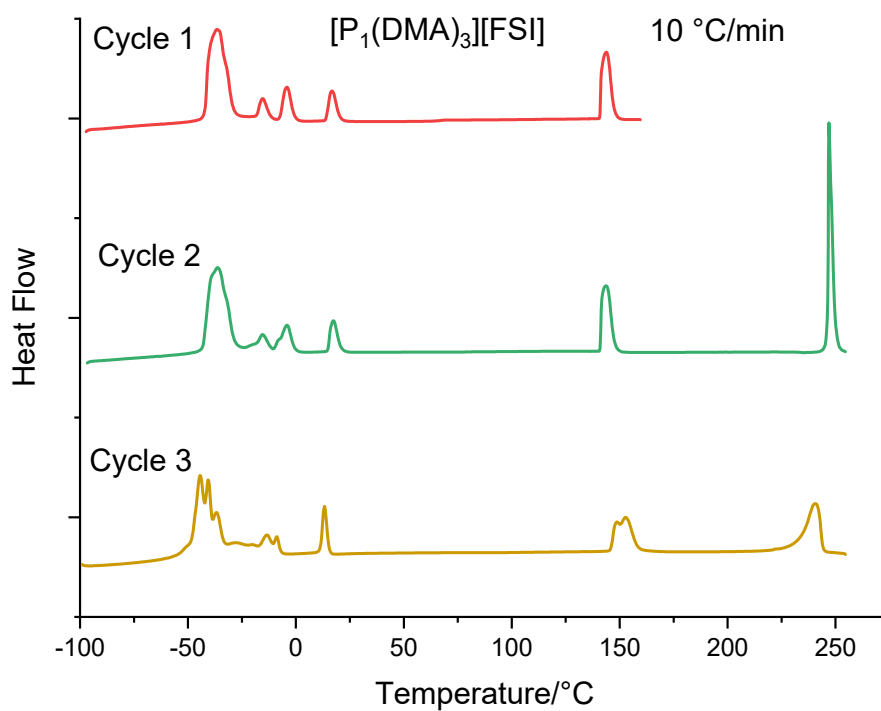

**Figure S1.** DSC of  $[P_1(\text{DMA})_3][\text{FSI}]$  showing three heating cycles that indicate a change in the solid-solid transitions after melting.

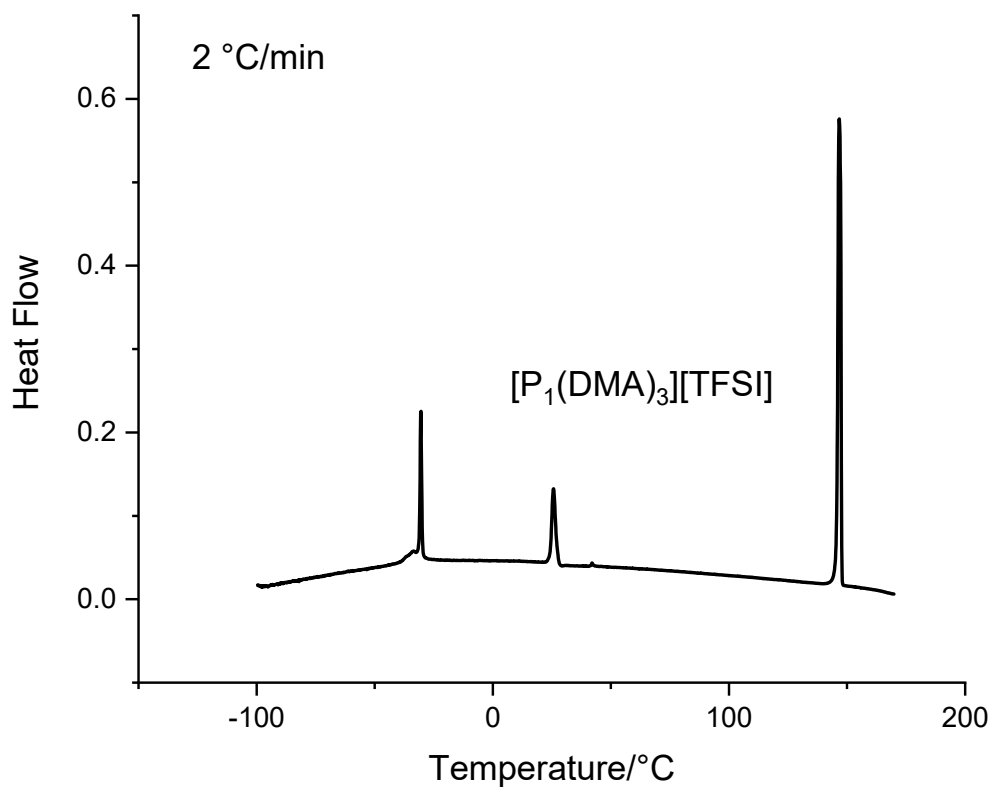

**Figure S2.** DSC of  $[P_1(\text{DMA})_3][\text{TFSI}]$  at a scan rate of 2 °C/min reflecting a single peak at 46 °C

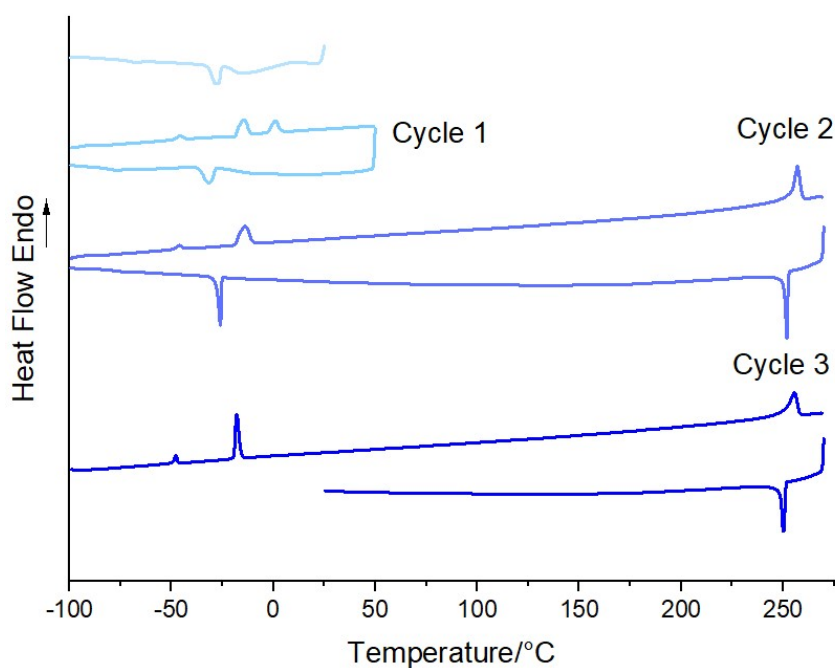

**Figure S3.** DSC of  $[P_1(\text{DEA})_3][\text{FSI}]$  showing the change of the solid-solid transition (near 0 °C) between cycle 1 and cycle 2

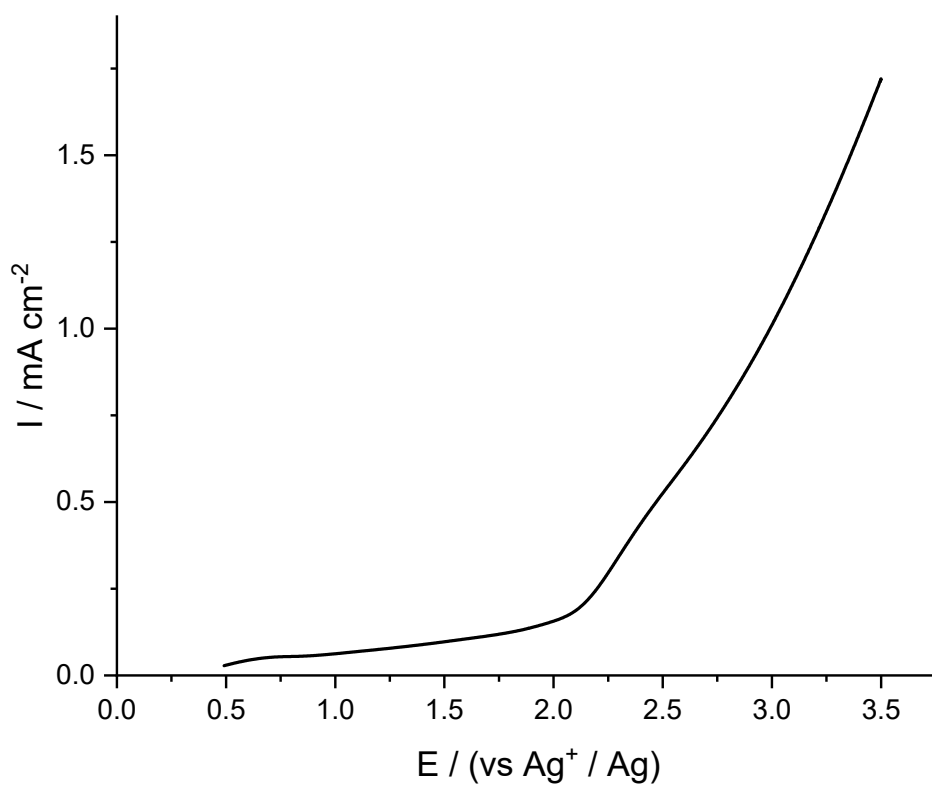

**Figure S4.** LSV curve of 50mol% NaFSI/[P1(DEA)3][FSI] using Cu as WE, Pt as CE and Ag<sup>+</sup>/AgOTf as RE at a scan rate of 10 mV/s.

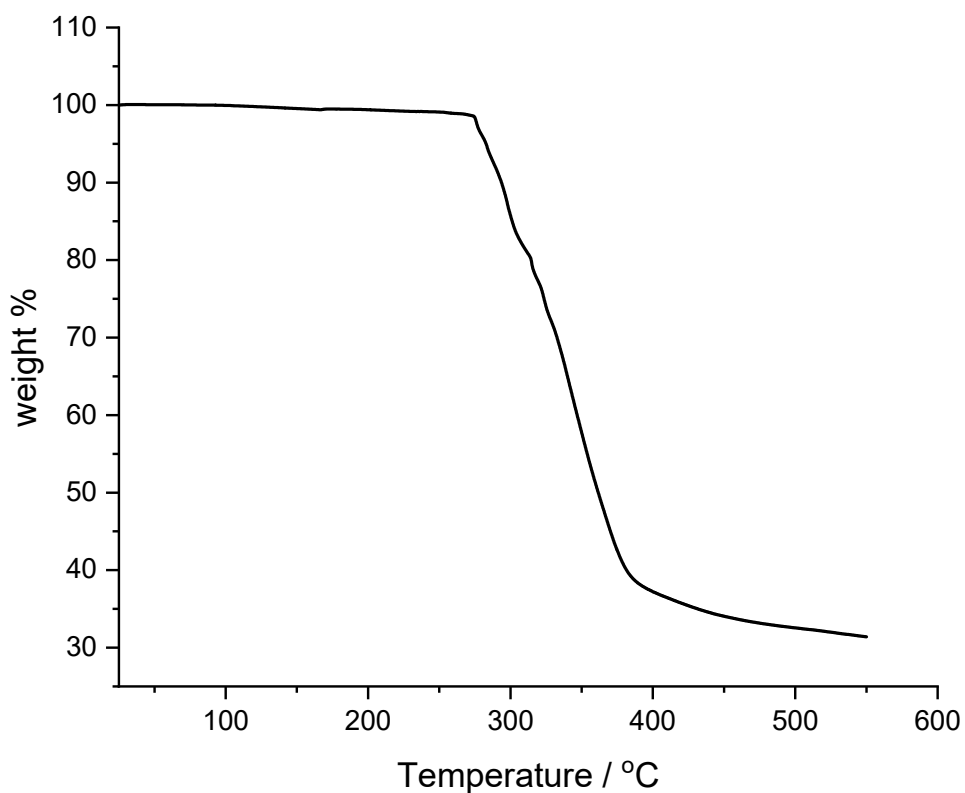

**Figure S5.** TGA thermograms of the 50mol% NaFSI/[P1(DEA)3][FSI], recorded at a heating rate of 10°C/min.

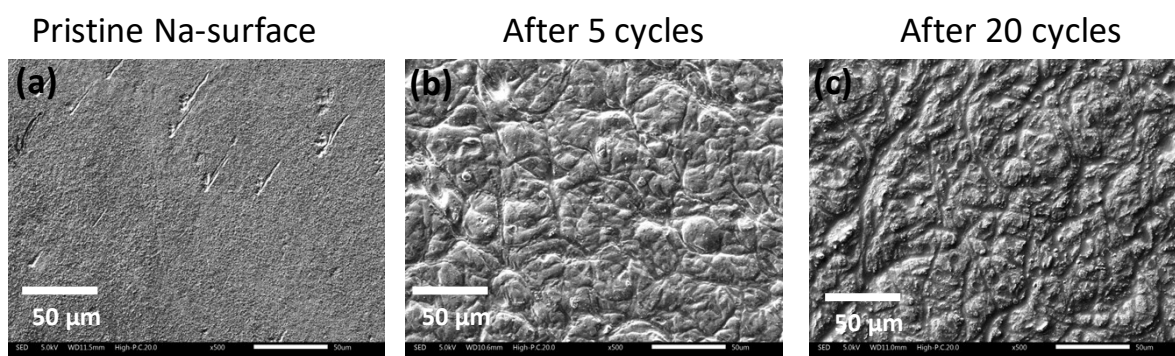

**Figure S6.** SEM images (50  $\mu\text{m}$ ) of the Na metal (d) at pristine state, (e) after 5 cycles and (f) after 20 cycles under 0.5 mA cm<sup>-2</sup> with 1 h plating/stripping

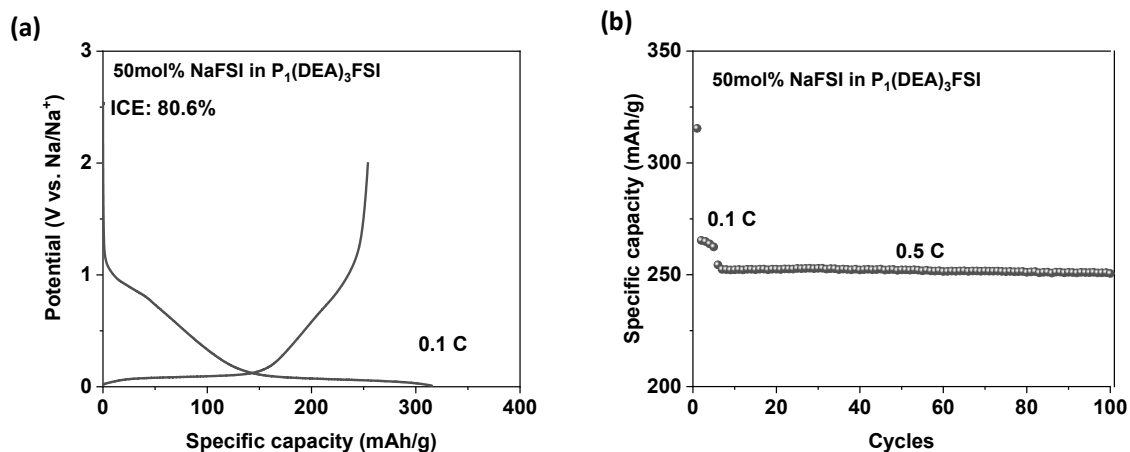

**Figure S7.** Cycling stability of Na/HC half-cell in 50 mol% NaFSI/P<sub>1</sub>(DEA)<sub>3</sub> electrolyte. (a) initial galvanostatic charge/discharge curve at C/10 (1C = 300 mAh/g); (b) cycling stability of 5 formation cycles at C/10, followed by 1/5 C for long term cycling.

**Table S1.** Electrochemical comparison of Na/Na symmetrical cell in different ionic liquid electrolytes at 50 °C

| ILs                                   | Salt                                   | Concentration (mol %)   | Current density (mA cm <sup>-2</sup> ) | Polarization time (h) | Cycles                  | Over potential (V)         | Ref                                                   |
|---------------------------------------|----------------------------------------|-------------------------|----------------------------------------|-----------------------|-------------------------|----------------------------|-------------------------------------------------------|
| P1(DEA) <sub>3</sub> FSI              | NaFSI                                  | 50                      | 0.5/<br>0.5                            | 1/2                   | 120/75                  | 0.06/<br>0.07              | This work                                             |
| C <sub>3</sub> mpyrFSI                | NaFSI                                  | 50                      | 0.5                                    | 0.13                  | 20                      | 0.13                       | J. Phys. Chem. C 2016, 120, 4276–4286                 |
| C <sub>3</sub> mpyDCA                 | NaFSI/<br>NaDCA/<br>NaTFSI/<br>NaFTFSI | 19/<br>18/<br>18/<br>18 | 0.1                                    | 1                     | 25/<br>25/<br>25/<br>25 | 0.1/<br>0.08/<br>3.2/<br>3 | ACS Appl. Mater. Interfaces 2019, 11, 46, 43093–43106 |
| Dry C <sub>3</sub> mpyrFSI (< 30 ppm) | NaFSI                                  | 50                      | 1                                      | 1                     | 100                     | 0.139                      | ACS Appl. Mater. Interfaces                           |

|                                             |       |    |      |   |     |       |                                                                      |
|---------------------------------------------|-------|----|------|---|-----|-------|----------------------------------------------------------------------|
|                                             |       |    |      |   |     |       | 2022, 14,<br>15784-1<br>5798                                         |
| Wet<br>C <sub>3</sub> mpyrFSI<br>(~1000ppm) | NaFSI | 50 | 1    | 1 | 100 | 0.083 | ACS<br>Appl.<br>Mater.<br>Interfaces<br>2022, 14,<br>15784-1<br>5798 |
| Dry P <sub>111i4</sub> FSI<br>(< 30 ppm)    | NaFSI | 42 | 1    | 1 | 100 | 0.131 | ACS<br>Appl.<br>Mater.<br>Interfaces<br>2022, 14,<br>15784-1<br>5798 |
| Wet P <sub>111i4</sub> FSI<br>(~1000 ppm)   | NaFSI | 42 | 1    | 1 | 100 | 0.081 | ACS<br>Appl.<br>Mater.<br>Interfaces<br>2022, 14,<br>15784-1<br>5798 |
| C <sub>3</sub> mpyrFSI                      | NaFSI | 50 | 0.05 | 1 | 50  | 0.03  | ChemSus<br>Chem201<br>9,12,1700<br>-1711                             |
